# Supplementary material for: Using Mobile Device Data to Understand the Effect of Stay-at-Home Orders on Residents’ Mobility
Source: Atypon-hosted journal article supplement (doi:10.1287/msom.2021.1014), 2021-11-15
Supplement: msom.2021.1014.sm1.pdf [file msom.2021.1014.sm1.pdf]

# Appendix to the Paper “Using Mobile Device Data to Understand the Effect of Stay-at-Home Orders on Residents’ Mobility”

Guihua Wang

Jindal School of Management, University of Texas at Dallas  
guihua.wang@utdallas.edu

---

## Appendix A: Related Literature on Stay-at-Home Orders

**Table A1** Summary of Related Literature on Stay-at-Home Orders

| Paper                   | Methodology               | Mobility Data              | Study Period        |
|-------------------------|---------------------------|----------------------------|---------------------|
| Abouk et al. 2020       | difference-in-differences | Google                     | 02/15/20 - 04/25/20 |
| Alexander et al. 2020   | difference-in-differences | Unacast                    | 03/01/20 - 04/17/20 |
| Andersen 2020           | difference-in-differences | SafeGraph                  | 01/01/19 - 06/14/20 |
| Askitas et al. 2020     | multi-events model        | Google                     | 01/03/20 - 02/06/20 |
| Barrios et al. 2020     | difference-in-differences | Unacast                    | 02/24/20 - 03/31/20 |
| Bonaccorsi et al. 2020  | linear regression         | Facebook                   | 02/23/20 - 04/04/20 |
| Brodeur et al. 2020     | difference-in-differences | Google, Unacast            | 03/03/20 - 04/24/20 |
| Bryant et al. 2020      | Bayesian model            | Google                     | 02/05/20 - 03/29/20 |
| Brzezinski et al. 2020a | difference-in-differences | SafeGraph                  | 03/01/20 - 04/19/20 |
| Brzezinski et al. 2020b | difference-in-differences | SafeGraph                  | 01/01/20 - 04/23/20 |
| Brzezinski et al. 2020c | difference-in-differences | SafeGraph                  | 02/01/20 - 03/31/20 |
| Bushman et al. 2020     | Granger causality         | SafeGraph                  | 01/21/20 - 07/03/20 |
| Charoenwong et al. 2020 | difference-in-differences | SafeGraph                  | 02/01/20 - 03/30/20 |
| Chinazzi et al. 2020    | transmission model        | Baidu                      | 12/31/19 - 02/11/20 |
| Chiou et al. 2020       | difference-in-differences | SafeGraph                  | 02/01/20 - 03/21/20 |
| Cook et al. 2020        | difference-in-differences | Google, SafeGraph          | 02/15/20 - 05/27/20 |
| Cronin et al. 2002      | difference-in-differences | SafeGraph                  | 01/01/20 - 05/15/20 |
| Dasgupta et al. 2020    | negative binomial         | Descartes Labs, Google     | 04/15/20 - 04/17/20 |
| Dave et al. 2020        | difference-in-differences | SafeGraph                  | 03/08/20 - 04/17/20 |
| Ding et al. 2020        | difference-in-differences | SafeGraph                  | 01/22/20 - 04/30/20 |
| Engle et al. 2020       | difference-in-differences | Unacast                    | 02/24/20 - 03/25/20 |
| Fang et al. 2020        | difference-in-differences | Baidu                      | 01/01/20 - 02/29/20 |
| Fowler et al. 2020      | difference-in-differences | Not Applicable             | 03/01/20 - 05/07/20 |
| Gao et al. 2020         | linear regression         | Descartes Labs, SafeGraph  | 03/11/20 - 04/10/20 |
| Gatto et al. 2020       | transmission model        | Not Applicable             | 02/24/20 - 03/25/20 |
| Grossman et al. 2020    | difference-in-differences | SafeGraph                  | 03/01/20 - 03/31/20 |
| Guo 2020                | synthetic control method  | SafeGraph                  | 02/01/20 - 04/14/20 |
| Gupta et al. 2020       | difference-in-differences | PlaceIQ, SafeGraph         | 01/01/20 - 03/31/20 |
| Huang 2020              | difference-in-differences | Google, PlaceIQ, SafeGraph | 02/20/20 - 04/20/20 |
| Jacobsen et al. 2020    | summary statistics        | Apple, Google              | 02/15/20 - 03/29/20 |
| Jay et al. 2020         | linear regression         | SafeGraph                  | 01/06/20 - 05/01/20 |
| Klein et al. 2020       | summary statistics        | Cuebiq                     | 01/01/20 - 03/25/20 |
| Kraemer et al. 2020     | generalized linear model  | Baidu                      | 01/01/20 - 02/04/20 |
| Lin et al. 2020         | difference-in-differences | Google                     | 03/01/20 - 04/25/20 |
| Luther 2020             | difference-in-differences | Google                     | 02/15/20 - 04/26/20 |
| Lyu et al. 2020         | event study               | Not Applicable             | 03/21/20 - 05/15/20 |
| McGrail et al. 2020     | linear regression         | Google                     | 02/15/20 - 06/05/20 |
| Painter et al. 2020     | difference-in-differences | SafeGraph                  | 01/01/20 - 04/23/20 |
| Wang 2020               | difference-in-differences | Google                     | 03/07/20 - 04/03/20 |
| Weill et al. 2020       | difference-in-differences | Google, SafeGraph          | 01/01/20 - 04/21/20 |
| Wellenius et al. 2020   | regression discontinuity  | Google                     | 01/03/20 - 03/29/20 |
| Wright et al. 2020      | difference-in-differences | Unacast                    | 02/23/20 - 05/01/20 |
| Yang et al. 2020        | transmission model        | SafeGraph                  | 03/01/20 - 06/07/20 |
| Yilmazkuday 2020        | difference-in-differences | Google                     | 02/15/20 - 05/20/20 |

Note: This table summarizes related literature on stay-at-home orders. To provide a complete picture of the current literature, we include papers written both before and after the completion of this paper. However, it is worth noting that some of the papers included in this literature review are incomplete working papers with preliminary results that are subject to change.

## Appendix B: Probit Analysis

**Table B1 Results from the Probit Analysis**

| Variable           | Coefficient | Standard Error |
|--------------------|-------------|----------------|
| RaceBlack          | 0.073       | 0.054          |
| RaceOthers         | 0.016       | 0.028          |
| HispanicYes        | 0.017       | 0.040          |
| HighSchoolYes      | -0.087      | 0.158          |
| InsuranceYes       | 0.073       | 0.107          |
| StayAtHome         | 0.243       | 0.167          |
| Number of States   |             | 50             |
| Adjusted R-Squared |             | 0.277          |

Note: \*\*\*  $p < 0.01$ , \*\*  $p < 0.05$ , \*  $p < 0.1$ . This table summarizes the results from the probit analysis, where the dependent variable is whether a state implemented a stay-at-home order during our study period and independent variables are state features and pre-treatment outcomes.

## Appendix C: Robustness Checks

**Table C1 Effect of Stay-at-Home Orders on Staying at Home (Leave-State-Out Analysis)**

| Left-Out State | Coef.     | Std. Err. | Left-Out State | Coef.     | Std. Err. |
|----------------|-----------|-----------|----------------|-----------|-----------|
| Alabama        | 2.804 *** | 0.329     | Missouri       | 2.908 *** | 0.325     |
| Alaska         | 2.840 *** | 0.328     | Montana        | 2.852 *** | 0.328     |
| Arizona        | 2.830 *** | 0.328     | Nebraska       | 2.785 *** | 0.341     |
| Arkansas       | 2.892 *** | 0.346     | Nevada         | 2.835 *** | 0.327     |
| California     | 2.773 *** | 0.339     | New Hampshire  | 2.834 *** | 0.327     |
| Colorado       | 2.828 *** | 0.331     | New Jersey     | 2.710 *** | 0.307     |
| Connecticut    | 2.814 *** | 0.327     | New Mexico     | 2.866 *** | 0.328     |
| Delaware       | 2.828 *** | 0.327     | New York       | 2.740 *** | 0.316     |
| DC             | 2.829 *** | 0.326     | North Carolina | 2.859 *** | 0.333     |
| Florida        | 2.811 *** | 0.330     | North Dakota   | 2.825 *** | 0.335     |
| Georgia        | 2.779 *** | 0.330     | Ohio           | 2.824 *** | 0.335     |
| Hawaii         | 2.821 *** | 0.327     | Oklahoma       | 2.984 *** | 0.316     |
| Idaho          | 2.863 *** | 0.326     | Oregon         | 2.850 *** | 0.329     |
| Illinois       | 2.803 *** | 0.339     | Pennsylvania   | 2.821 *** | 0.335     |
| Indiana        | 2.842 *** | 0.332     | South Carolina | 2.816 *** | 0.330     |
| Iowa           | 2.833 *** | 0.346     | South Dakota   | 2.834 *** | 0.338     |
| Kansas         | 2.852 *** | 0.331     | Tennessee      | 2.856 *** | 0.329     |
| Kentucky       | 2.922 *** | 0.324     | Texas          | 2.695 *** | 0.312     |
| Louisiana      | 2.856 *** | 0.333     | Utah           | 2.958 *** | 0.318     |
| Maine          | 2.851 *** | 0.327     | Vermont        | 2.831 *** | 0.327     |
| Maryland       | 2.810 *** | 0.328     | Virginia       | 2.831 *** | 0.341     |
| Massachusetts  | 2.799 *** | 0.326     | Washington     | 2.838 *** | 0.330     |
| Michigan       | 2.781 *** | 0.331     | West Virginia  | 2.854 *** | 0.330     |
| Minnesota      | 2.858 *** | 0.332     | Wisconsin      | 2.860 *** | 0.331     |
| Mississippi    | 2.821 *** | 0.331     | Wyoming        | 2.811 *** | 0.329     |

Note: \*\*\*  $p < 0.01$ , \*\*  $p < 0.05$ , \*  $p < 0.1$ . This robustness check addresses a potential concern that our result in the main analysis is driven by a particular state, by leaving one state out each time and re-estimating the treatment effect.

**Table C2 Effect of Stay-at-Home Orders on Staying at Home (Leave-Days-Out Analysis)**

| Left-Out          | Coef.     | Std. Err. | Left-Out  | Coef.     | Std. Err. |
|-------------------|-----------|-----------|-----------|-----------|-----------|
| Days of Week      |           |           | A Month   |           |           |
| Mondays           | 2.879 *** | 0.322     | January   | 2.721 *** | 0.342     |
| Tuesdays          | 2.871 *** | 0.333     | February  | 2.862 *** | 0.353     |
| Wednesdays        | 2.776 *** | 0.338     | March     | 2.574 *** | 0.365     |
| Thursdays         | 2.836 *** | 0.335     | April     | 3.082 *** | 0.407     |
| Fridays           | 2.823 *** | 0.325     | May       | 2.973 *** | 0.354     |
| Saturdays         | 2.846 *** | 0.321     | June      | 2.841 *** | 0.317     |
| Sundays           | 2.832 *** | 0.326     | July      | 2.767 *** | 0.296     |
| Weekdays/Weekends |           |           | August    |           |           |
| Weekdays          | 2.846 *** | 0.321     | September | 2.842 *** | 0.313     |
| Weekends          | 2.746 *** | 0.439     | October   | 2.891 *** | 0.324     |

Note: \*\*\*  $p < 0.01$ , \*\*  $p < 0.05$ , \*  $p < 0.1$ . This robustness check addresses a potential concern that our result in the main analysis is driven by a particular period of time, by performing three different leave-days-out analyses in which we leave out (1) the same day (e.g., Mondays) of a week, (2) weekdays or weekends, and (3) a month.

**Table C3 Effect of Stay-at-Home Orders on Staying at Home (Other Robustness Checks)**

| Robustness Check             | Coef.     | Std. Err. | Robustness Check         | Coef.     | Std. Err. |
|------------------------------|-----------|-----------|--------------------------|-----------|-----------|
| Other Statewide Policies     |           |           | Lagged StayAtHome        |           |           |
| Workplace Closures           | 2.373 *** | 0.322     | 1 day before             | 0.988 *** | 0.106     |
| Mask Mandates                | 2.822 *** | 0.319     | 2 days before            | 1.158 *** | 0.132     |
| Restaurant Restrictions      | 2.642 *** | 0.314     | 3 days before            | 1.194 *** | 0.134     |
| School Closures              | 2.837 *** | 0.330     | 4 days before            | 1.238 *** | 0.140     |
| All Measures                 | 2.340 *** | 0.319     | 5 days before            | 1.290 *** | 0.150     |
| County Fixed Effects         | 2.959 *** | 0.316     | 6 days before            | 1.310 *** | 0.155     |
| Potential Endogeneity Issues | 1.399 *** | 0.302     | 7 days before            | 1.261 *** | 0.154     |
| Alternative Treatment Group  | 1.664 *** | 0.473     | $\ln(\text{StayAtHome})$ | 0.113 *** | 0.014     |
| Baseline StayAtHome          | 2.877 *** | 0.320     | Alternative Data         | 2.103 *** | 0.011     |

Note: \*\*\*  $p < 0.01$ , \*\*  $p < 0.05$ , \*  $p < 0.1$ . This table summarizes the results from seven robustness checks in which we (1) control for other statewide policies such as workplace closures, mask mandates, restaurant restrictions, and school closures, (2) include county fixed effects to control for systematic differences across counties, (3) address potential endogeneity issues by using counties with early implementation dates as a control group and those with late implementation dates as a treatment group, (4) use nearby states as an alternative treatment group, (5) include the baseline percentage of residents staying at home or a lagged version of the dependent variable as an additional independent variable, (6) use the log-transformed percentage of residents staying at home,  $\ln(\text{StayAtHome})$ , as an alternative dependent variable, or (7) use alternative data from SafeGraph.

**Table C4 Heterogeneous Effects of the Orders on Staying at Home (Alternative Data)**

| Variable               | (1) Uninsured |           | (2) NoHighSchool |           |
|------------------------|---------------|-----------|------------------|-----------|
|                        | Coef.         | Std. Err. | Coef.            | Std. Err. |
| Order Implementation   | 2.408 ***     | 0.017     | 2.465 ***        | 0.016     |
| × Target Feature       | -0.043 ***    | 0.001     | -0.030 ***       | 0.001     |
| Order Expiration       | Included      |           | Included         |           |
| × Target Feature       | Included      |           | Included         |           |
| Number of Observations | 9,006,184     |           | 9,006,184        |           |
| Adjusted R-Squared     | 0.350         |           | 0.350            |           |

Note: \*\*\*  $p < 0.01$ , \*\*  $p < 0.05$ , \*  $p < 0.1$ . This robustness check uses SafeGraph's Social Distancing Metrics as alternative data. In columns (1)–(2), the target features are *Uninsured* and *NoHighSchool*, respectively.

## Appendix D: Effect of Stay-at-Home Orders on Work and Non-Work Trips

Figure D1 compares the number of work and non-work trips in the control and treatment groups over different days. To examine the treatment effect heterogeneity across insurance, we divide counties into two categories of equal size based on the percentage of residents without health insurance. We informally designate these two categories as “Counties with Higher Percentages of Residents without Health Insurance” and “Counties with Lower Percentages of Residents without Health Insurance”. For each category, we compare the number of work (Figure D2) and non-work (Figure D4) trips. Similarly, to examine the treatment effect heterogeneity across education, we divide counties into two categories of equal size based on the percentage of residents who did not attend high school. We informally designate these two categories as “Counties with Higher Percentages of Residents without High School Diploma” and “Counties with Lower Percentages of Residents without High School Diploma”. For each category, we compare the number of work (Figure D3) and non-work (Figure D5) trips. In all figures, the two vertical dashed lines indicate the first (March 19, 2020) and last (April 7, 2020) orders implemented different states.

**Figure D1 Compare Control and Treatment Counties (Number of Work and Non-Work Trips)**

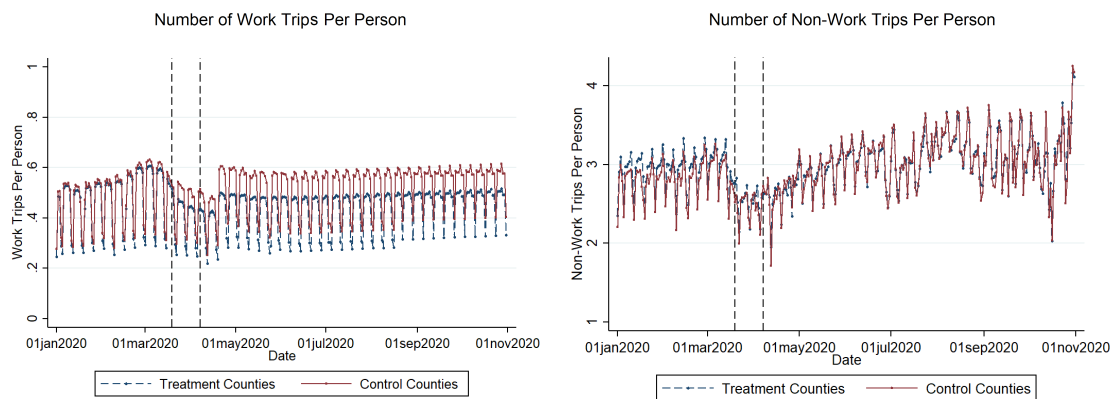

**Figure D2 Comparison by Percentage of Residents without Health Insurance (Work Trips)**

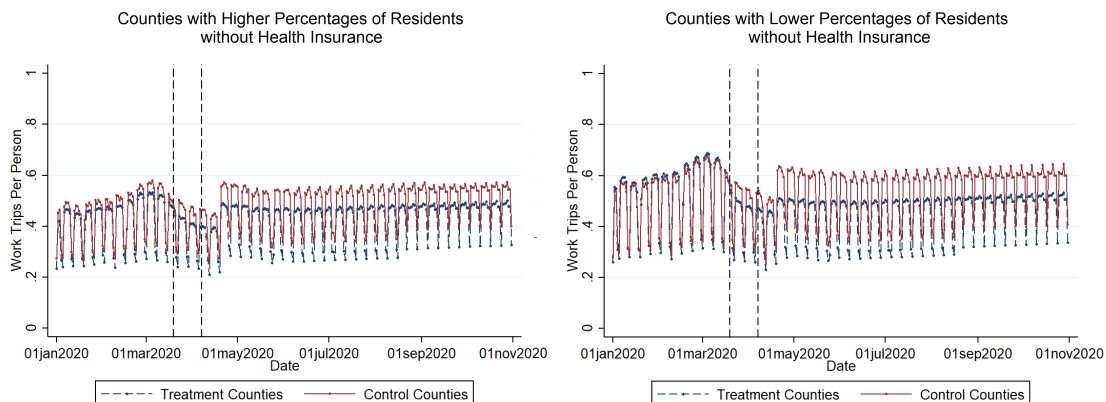

**Figure D3 Comparison by Percentage of Residents without High School Diploma (Work Trips)**

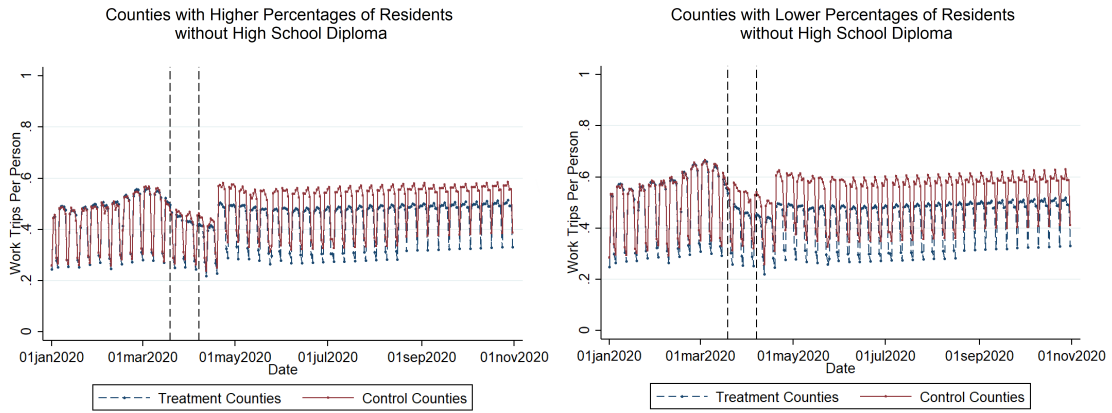

**Figure D4 Comparison by Percentage of Residents without Health Insurance (Non-Work Trips)**

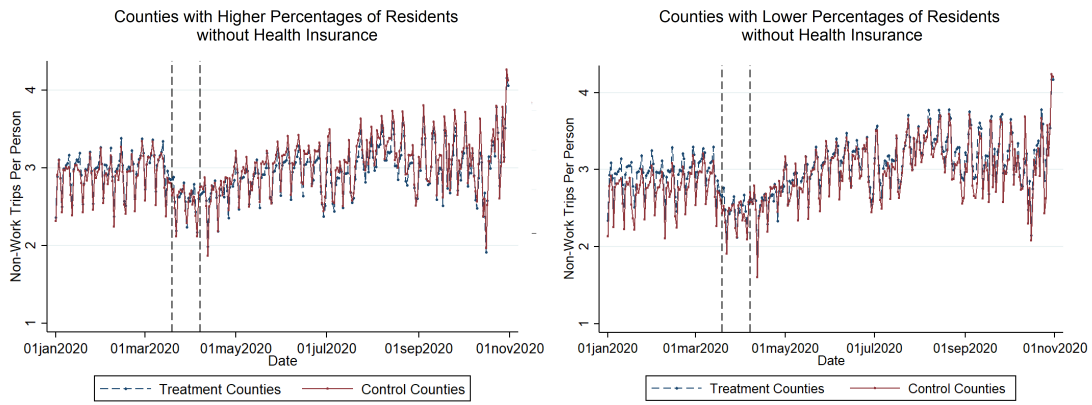

**Figure D5 Comparison by Percentage of Residents without High School Diploma (Non-Work Trips)**

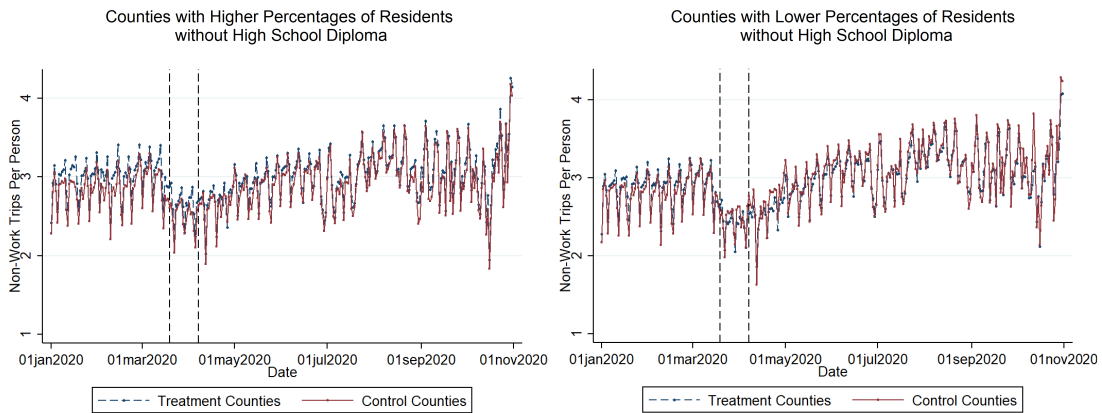

## Appendix E: Impact of Mobility on Infections

In this section, we first describe our empirical strategy for estimating the impact of mobility on infections. We then describe the two-stage least square regressions (2SLS) model to address potential endogeneity issues. Finally, we discuss the results from the 2SLS model and perform robustness checks to analyze the sensitivity of our result.

### E.1. Empirical Strategy

Analyzing the impact of mobility on infections presents two major challenges. The first challenge is endogeneity issue. There might be unobservable factors that affect both residents' mobility and infections. For example, wearing a mask might increase residents' mobility and, at the same time, reduce infections. The second challenge is reverse causality. While an increase in residents' mobility might increase infections, an increase in infections might reduce residents' mobility. Therefore, simply regressing infections on residents' mobility might lead to biased results.

To address the endogeneity issue, we follow Glaeser et al. (2020) by using residential teleworkable shares as an instrumental variable for residents' mobility. As described in Glaeser et al. (2020), the share of teleworking workers is a valid instrument, because it correlates residents' mobility (i.e., the relevance condition) but does not directly impact infections (i.e., the exclusion condition). To address the second challenge, we use a lagged version of residents' mobility as an independent variable. The intuition behind this approach is that the lagged mobility impacts infections but not vice versa. This approach is consistent with existing medical literature (see e.g., Li et al. 2020) that there is a lag between exposure and infection.

### E.2. Econometric Model

To describe the econometric model, we let  $Infection_{it}$  denote per capita infection rate in county  $i$  on day  $t$ .<sup>1</sup> We follow existing public health literature (see e.g., Silva 2020) to calculate per capita infection rate by dividing the number of infections by the number of residents in a county. We use per capita infection rate instead of the number of infections as the dependent variable, because correcting for population size allows us to compare counties of different sizes. As robustness check, we use the number of infections as an alternative dependent variable to check the sensitivity of our results.

Our main independent variable of interest is the percentage of residents staying at home in county  $i$  on day  $t$  (denoted by  $StayAtHome_{it}$ ). We include county features (denoted by  $Feature_i$ ) to control for the differences across counties, a vector of state dummies (denoted by  $State_i$ ) to control for the systematic differences across these counties' states, and a vector of day dummies (denoted by  $Day_t$ ) to control for time trends of infection rate. To describe the instrumental variable, we denote by  $Teleworking_i$  the share of teleworking workers in county  $i$ . We estimate the effect of staying at home on infection rate using the 2SLS model:

$$StayAtHome_{it} = \alpha_0 + \alpha_1 Teleworking_i + \alpha_2 State_{j(i)} + \alpha_3 Day_t + \alpha_4 Feature_i + \varepsilon_{it}, \quad (1)$$

$$Infection_{i,t+k} = \beta_0 + \beta_1 \widehat{StayAtHome}_{it} + \beta_2 State_{j(i)} + \beta_3 Day_t + \beta_4 Feature_i + \zeta_{it}, \quad (2)$$

where  $k$  indicates the lag between staying at home and infection,  $\widehat{StayAtHome}_{it}$  is the predicted value from equation (1),  $\beta_1$  is the bias-corrected 2SLS estimator of the impact of staying at home on infection rate, and  $\varepsilon_{it}$  and  $\zeta_{it}$  are idiosyncratic errors.

### E.3. Results and Discussion

The results from the first-stage equation are summarized in the first row of Table E1. We see the coefficient of the instrumental variable is significantly different from zero at the 1% significance level, which suggests the instrumental variable has a strong first stage. The positive coefficient suggests a positive correlation between the share of teleworking workers and the percentage of residents staying at home.

**Table E1    Impact of Mobility on Infections**

| Variable               | IV Regression |           | Non-IV Regression |           |
|------------------------|---------------|-----------|-------------------|-----------|
|                        | Coef.         | Std. Err. | Coef.             | Std. Err. |
| First Stage: IV        | 0.202 ***     | 0.002     |                   |           |
| StayAtHome             | -4.844 ***    | 0.728     | 1.303 ***         | 0.079     |
| County Features        | Included      |           | Included          |           |
| Day Fixed Effects      | Included      |           | Included          |           |
| State Fixed Effects    | Included      |           | Included          |           |
| Number of Observations | 924,396       |           | 924,396           |           |

Note: \*\*\*  $p < 0.01$ , \*\*  $p < 0.05$ , \*  $p < 0.1$ .

The results from the second-stage equation are summarized in the second row of Table E1.<sup>2</sup> We see the coefficient of *StayAtHome* is negative and significantly different from zero at the 1% significance level, which suggests infection rate decreases as the percentage of residents staying at home increases. More specifically, a coefficient of -4.844 means a one percentage point increase in the percentage of residents staying at home reduces infection rate by 4.844.

As a comparison, the right side of Table E1 summarizes the results from a multivariate regression model without an instrumental variable. We see the coefficient of *StayAtHome* is positive and significantly different from zero at the 1% significance level, which suggests infection rate increases as the percentage of residents staying at home increases. This comparison suggests ignoring potential endogeneity issues leads to a biased estimate of the impact of staying at home on infection rate.

### E.4. Robustness Checks

We perform five robustness checks to analyze the sensitivity of our results. The first robustness check performs leave-state-out analyses by leaving out one state at a time. The second robustness check performs leave-days-out analyses by leaving the same day of a week, weekdays or weekends, or a specific month at a time. The third robustness check uses the independent variable with a lag of 0, 1, ..., 6, or 14 days. The fourth robustness check includes mask mandates as an additional independent variable. The fifth robustness check uses the log-transformed infection rate and the number of infections as alternative dependent variables.

Tables E2, E3, and E4 summarize the results from these robustness checks. We see all coefficients of *StayAtHome* are negative and significantly different from zero at the 1% significance level, which suggests an increase in the percentage of residents staying at home reduces infection rate. Note that the results from the last two robustness checks are different from that in the main analysis because they use different dependent variables. These robustness checks suggest our results are not driven by a particular state or period, the value of a lag, other statewide policies such as mask mandates, or the form of the dependent variable.

**Table E2 Results from the Instrumental Variable Model (Leave-State-Out Analysis)**

| Left-Out State | Coef.      | Std. Err. | Left-Out State | Coef.      | Std. Err. |
|----------------|------------|-----------|----------------|------------|-----------|
| Alabama        | -4.741 *** | 0.728     | Missouri       | -4.536 *** | 0.754     |
| Alaska         | -4.858 *** | 0.745     | Montana        | -4.693 *** | 0.716     |
| Arizona        | -4.826 *** | 0.725     | Nebraska       | -4.196 *** | 0.699     |
| Arkansas       | -4.646 *** | 0.732     | Nevada         | -4.886 *** | 0.731     |
| California     | -5.089 *** | 0.790     | New Hampshire  | -4.815 *** | 0.726     |
| Colorado       | -4.272 *** | 0.697     | New Jersey     | -4.891 *** | 0.733     |
| Connecticut    | -4.859 *** | 0.729     | New Mexico     | -4.849 *** | 0.757     |
| Delaware       | -4.856 *** | 0.729     | New York       | -5.389 *** | 0.749     |
| DC             | -4.844 *** | 0.728     | North Carolina | -4.989 *** | 0.733     |
| Florida        | -4.028 *** | 0.725     | North Dakota   | -5.252 *** | 0.745     |
| Georgia        | -4.955 *** | 0.714     | Ohio           | -4.862 *** | 0.773     |
| Hawaii         | -4.844 *** | 0.727     | Oklahoma       | -4.653 *** | 0.732     |
| Idaho          | -4.975 *** | 0.729     | Oregon         | -4.689 *** | 0.732     |
| Illinois       | -4.930 *** | 0.736     | Pennsylvania   | -5.243 *** | 0.735     |
| Indiana        | -5.196 *** | 0.753     | South Carolina | -5.096 *** | 0.737     |
| Iowa           | -4.358 *** | 0.728     | South Dakota   | -5.035 *** | 0.729     |
| Kansas         | -5.302 *** | 0.738     | Tennessee      | -5.259 *** | 0.674     |
| Kentucky       | -5.501 *** | 0.924     | Texas          | -2.921 *** | 0.744     |
| Louisiana      | -5.001 *** | 0.718     | Utah           | -4.938 *** | 0.710     |
| Maine          | -4.840 *** | 0.727     | Vermont        | -4.857 *** | 0.727     |
| Maryland       | -4.890 *** | 0.734     | Virginia       | -4.655 *** | 0.718     |
| Massachusetts  | -5.015 *** | 0.747     | Washington     | -5.049 *** | 0.724     |
| Michigan       | -4.832 *** | 0.738     | West Virginia  | -4.964 *** | 0.760     |
| Minnesota      | -4.751 *** | 0.734     | Wisconsin      | -4.484 *** | 0.739     |
| Mississippi    | -4.987 *** | 0.717     | Wyoming        | -5.333 *** | 0.758     |

Note: \*\*\*  $p < 0.01$ , \*\*  $p < 0.05$ , \*  $p < 0.1$ .

**Table E3 Results from the Instrumental Variable Model (Leave-Days-Out Analysis)**

| Left-Out          | Coef.      | Std. Err. | Left-Out  | Coef.      | Std. Err. |
|-------------------|------------|-----------|-----------|------------|-----------|
| Days of Week      |            |           | A Month   |            |           |
| Mondays           | -4.785 *** | 0.801     | January   | -5.205 *** | 0.782     |
| Tuesdays          | -4.875 *** | 0.818     | February  | -5.279 *** | 0.792     |
| Wednesdays        | -4.888 *** | 0.814     | March     | -5.556 *** | 0.809     |
| Thursdays         | -4.252 *** | 0.802     | April     | -4.843 *** | 0.831     |
| Fridays           | -5.063 *** | 0.677     | May       | -3.503 *** | 0.732     |
| Saturdays         | -4.879 *** | 0.775     | June      | -4.029 *** | 0.783     |
| Sundays           | -5.152 *** | 0.807     | July      | -4.170 *** | 0.771     |
| Weekdays/Weekends |            |           | August    | -3.798 *** | 0.694     |
| Weekdays          | -3.653 *** | 1.273     | September | -6.046 *** | 0.745     |
| Weekends          | -5.246 *** | 0.872     | October   | -5.951 *** | 0.721     |

Note: \*\*\*  $p < 0.01$ , \*\*  $p < 0.05$ , \*  $p < 0.1$ .

**Table E4 Results from the Instrumental Variable Model (Other Robustness Checks)**

| Robustness Check                                  | Coefficient | Standard Error |
|---------------------------------------------------|-------------|----------------|
| Include Lagged StayAtHome                         |             |                |
| same day                                          | -4.753 ***  | 0.714          |
| 1 day before                                      | -4.752 ***  | 0.714          |
| 2 days before                                     | -4.767 ***  | 0.716          |
| 3 days before                                     | -4.785 ***  | 0.719          |
| 4 days before                                     | -4.799 ***  | 0.721          |
| 5 days before                                     | -4.815 ***  | 0.724          |
| 6 days before                                     | -4.834 ***  | 0.726          |
| 14 days before                                    | -4.953 ***  | 0.743          |
| Control for Mask Mandates                         | -4.844 ***  | 0.727          |
| $\ln(\text{InfectionRate})$ as Dependent Variable | -0.049 ***  | 0.004          |
| Number of Infections as Dependent Variable        | -0.414 ***  | 0.124          |

Note: \*\*\*  $p < 0.01$ , \*\*  $p < 0.05$ , \*  $p < 0.1$ .
